# Supplementary material for: Genetic dissection of vitamin E biosynthesis in tomato
Source: PubMed Central journal article supplement — J Exp Bot. 2011 Apr 28;62(11):3781–98. doi: 10.1093/jxb/err055 (PMC3134339; doi:10.1093/jxb/err055), 2011-04-28
Supplement: supp_err055_00055194-file001.pdf [file supp_err055_00055194-file001.pdf]

## Genetic dissection of vitamin E biosynthesis in tomato

Juliana Almeida, Leandro Quadrana, Ramón Asís, Nathalia Setta, Fabiana de Godoy, Luisa Bermúdez, Santiago Otaiza, Junia V Corrêa da Silva, Alisdair R Fernie, Fernando Carrari, and Magdalena Rossi

### Supplementary Material

Table S1. Primer sequences

| GENE           | UNIGENE                                            | Foward<br>Reverse                                      |
|----------------|----------------------------------------------------|--------------------------------------------------------|
| <i>ggps(1)</i> | U574849                                            | CTCATACAATGGCATTITTTAGCTACC<br>GCAAATCGACAGAATTGATAGGC |
| <i>ggps(2)</i> | U571085                                            | ATGAGATCTATGAATCTTGTGATTC<br>GATTACATTGCTAATCGTCAAATTA |
| <i>ggps(3)</i> | U573348                                            | ATGAGTCTTTCAACAACAATTACAAC<br>GCTTACAGAGAGAATTAATGTAAC |
| <i>ggps(4)</i> | U575882                                            | CGGAGATCAATTATGGTTTTCTC<br>GCCAAGTCTAGATCATGTTTAGC     |
| <i>tat(1)</i>  | U577103                                            | GTAATGGAAGGCAATTTGGTTGG<br>CATTGATTCTACTCCGATTAACGCC   |
| <i>tat(2)</i>  | U563404                                            | CATGGAGAACGGTACGACTAC<br>GCTTATTGTTTCTTAGCATGCC        |
| <i>tyra(1)</i> | U567861                                            | CCA TGTTGTCTTTCACCCAC<br>GTT AAACCTGAGAACAACTGAGGG     |
| <i>tyra(2)</i> | U570951                                            | CACATTCAACCATGTTTTCCC<br>GGAAGTAGAGGCACTTTCTTGA        |
| <i>vte4</i>    | U584511                                            | GTAATGGGCAGCCAATGCTATTC<br>CATCACATGTGAAAACCTGAATAA    |
| <i>vte1</i>    | U570602                                            | ATGGAGTGTGTTTCCGCCATTC<br>GCCTTTGAGCAAATGCAAAAAGTAG    |
| <i>vte3(1)</i> | U578249                                            | GCATTTGCTCAACTAATCATGGC<br>GAACCTCTGTGAGAGACCAAG       |
| <i>vte3(2)</i> | U581492                                            | CATGGCGTCTTCAATACTGAGTGG<br>CCGAAAGGTCAGCCCATCTGA      |
| <i>vte2</i>    | U327540 (covers 5' end)<br>U576207 (covers 3' end) | ATGGAATCTTTGCTTATTGGGTC<br>GTGAGGTGAATGAATGTACAAGC     |
| <i>vte5</i>    | U583081                                            | ATGGCTCTCTTTGCTTCTTCTG<br>GTTGGCAGTCTTGTTTTATGATACC    |
| <i>hppd(1)</i> | U580457                                            | ATGGGCAAACAAGCCGCTG<br>CCATCGAAGAATATGAAAAGACACTTG     |
| <i>hppd(2)</i> | U578997                                            | GGTGCTCCAAAATACAATGGGC<br>CAAGTAGCTGCTGTGCAATGA        |
| <i>apt</i>     | U566340                                            | CATGGCTCTGTTTCAGTGTCG<br>CGCGTTGATAATCTGGCTGA          |
| <i>prai</i>    | U564371                                            | GGAAGGATGCTCTCAGTGTTT<br>CGCAGTGAATCTTTACACCTTTAG      |
| <i>fpgs</i>    | U581922                                            | CTGTAGTGTGAAGAACAATAATG<br>GCTGACTCCTATTTGGTAAGAG      |
| <i>chl</i>     | U574853                                            | ATGGTGATAACTAGTACTTCTCTG<br>GGTTGTGGTTATATTGTACCCCTCG  |
| <i>sec14</i>   | U583419                                            | ATGGATTCTTCATCCCCATTAC<br>CAGCCTAAAATGAAGCAAATCTATG    |
| <i>lycb</i>    | U570109                                            | CTATAATGGAACCTTCTCAAGCC<br>CTAGCAATAGAGAGCCTTTGAATG    |
